# Supplementary material for: A Master Regulator of Bacteroides thetaiotaomicron Gut Colonization Controls Carbohydrate Utilization and an Alternative Protein Synthesis Factor
Source: PubMed Central journal article supplement (PMC6989115; doi:10.1128/mbio.03221-19), 2020-01-28

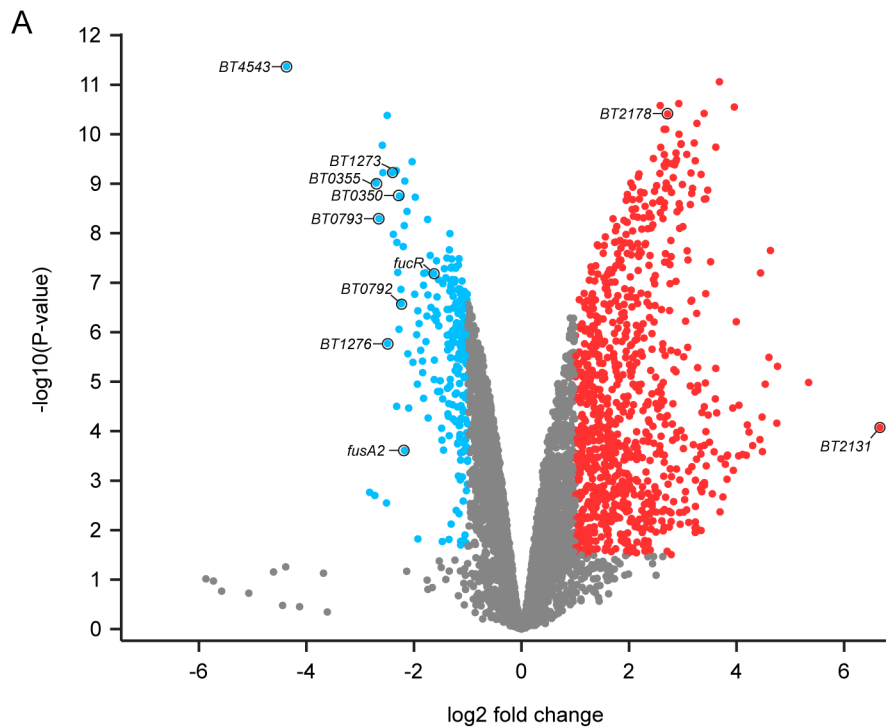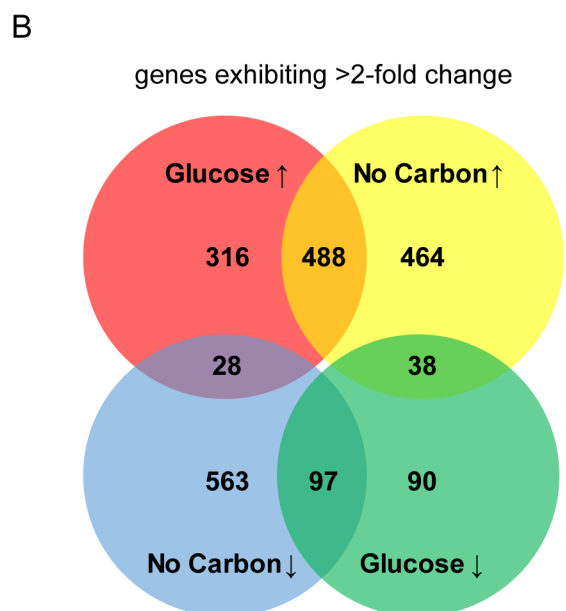

Supplement: mBio.03221-19-sf001.pdf [file mBio.03221-19-sf001.pdf]
