# Supplementary material for: A Master Regulator of Bacteroides thetaiotaomicron Gut Colonization Controls Carbohydrate Utilization and an Alternative Protein Synthesis Factor
Source: PubMed Central journal article supplement (PMC6989115; doi:10.1128/mbio.03221-19), 2020-01-28
Supplement: mBio.03221-19-st005.pdf [file mBio.03221-19-st005.pdf]

**Table S5. Bacterial strains used in this study.**

| <b>Bacterial Strains</b>                                                                                                  | <i>Source</i>     | <i>Identifier</i>    |
|---------------------------------------------------------------------------------------------------------------------------|-------------------|----------------------|
| <i>E. coli</i> S17-1 lambda pir                                                                                           | ATCC              | ATCC<br>BAA-<br>2428 |
| <i>B. thetaiotaomicron</i> VPI-5482                                                                                       | ATCC              | ATCC<br>29148        |
| <i>B. thetaiotaomicron</i> VPI-5482 <i>tdk</i>                                                                            | PMID:<br>18611383 | GT23                 |
| <i>B. thetaiotaomicron</i> VPI-5482 <i>tdk</i> $\Delta$ BT4338                                                            | PMID:<br>27729509 | NS364                |
| <i>B. thetaiotaomicron</i> VPI-5482 <i>tdk</i> $\Delta$ BT2167                                                            | This<br>study     | GT1309               |
| <i>B. thetaiotaomicron</i> VPI-5482 <i>tdk</i> $\Delta$ 22bp                                                              | This<br>study     | WH311                |
| <i>B. thetaiotaomicron</i> VPI-5482 <i>tdk</i> $\Delta$ BT4338 <i>pNBU2-tetQ::P(BT4338)-BT4338-4XGly-HA</i>               | This<br>study     | GT1481               |
| <i>B. thetaiotaomicron</i> VPI-5482 <i>tdk</i> $\Delta$ 22bp $\Delta$ BT4338 <i>pNBU2-tetQ::P(BT4338)-BT4338-4XGly-HA</i> | This<br>study     | WH335                |
| <i>B. thetaiotaomicron</i> VPI-5482 <i>tdk</i> BT2167-FLAG:: <i>pKNOCK-tetQ</i>                                           | This<br>study     | GT1301               |
| <i>B. thetaiotaomicron</i> VPI-5482 <i>tdk</i> $\Delta$ BT4338 BT2167-FLAG:: <i>pKNOCK-tetQ</i>                           | This<br>study     | GT1308               |

|                                                                                                       |                   |              |
|-------------------------------------------------------------------------------------------------------|-------------------|--------------|
| <i>B. thetaiotaomicron</i> VPI-5482 <i>tdk</i> $\Delta$ 22bp BT2167-FLAG:: <i>pKNOCK-tetQ</i>         | This study        | WH389        |
| <i>B. thetaiotaomicron</i> VPI-5482 <i>tdk pNBU2-tetQ::BC01</i>                                       | This study        | GT478        |
| <i>B. thetaiotaomicron</i> VPI-5482 <i>tdk</i> $\Delta$ BT2167 <i>pNBU2-tetQ::BC03</i>                | This study        | WH148        |
| <i>B. thetaiotaomicron</i> VPI-5482 <i>tdk</i> $\Delta$ BT4338 <i>pNBU2-tetQ::BC06</i>                | This study        | WH150        |
| <i>B. thetaiotaomicron</i> VPI-5482 <i>tdk</i> $\Delta$ BT22bp <i>pNBU2-tetQ::BC21</i>                | This study        | WH324        |
| <i>Bacteroides ovatus</i> NCTC11153                                                                   | ATCC              | ATCC<br>8483 |
| <i>Bacteroides ovatus</i> NCTC11153 $\Omega$ <i>Bovatus_RS22425::pKNOCK-tetQ</i>                      | This study        | WH275        |
| <i>B. thetaiotaomicron</i> VPI-5482 <i>tdk pNBU2-tetQ</i>                                             | This study        | GT1009       |
| <i>B. thetaiotaomicron</i> VPI-5482 <i>tdk</i> $\Delta$ BT4338 <i>pNBU2-tetQ</i>                      | PMID:<br>27729509 | NS432        |
| <i>B. thetaiotaomicron</i> VPI-5482 <i>tdk</i> $\Delta$ BT4338 <i>pNBU2-tetQ::P(BT4338)-BT4338-HA</i> | PMID:<br>27729509 | NS433        |
| <i>B. thetaiotaomicron</i> VPI-5482 <i>tdk pNBU2-tetQ::P(BT4338)-BT4338</i>                           | This study        | GT1498       |
| <i>B. thetaiotaomicron</i> VPI-5482 <i>tdk</i> $\Delta$ BT0700 $\Delta$ BT3998                        | This study        | GT1181       |
