# Supplementary material for: A Master Regulator of Bacteroides thetaiotaomicron Gut Colonization Controls Carbohydrate Utilization and an Alternative Protein Synthesis Factor
Source: PubMed Central journal article supplement (PMC6989115; doi:10.1128/mbio.03221-19), 2020-01-28
Supplement: mBio.03221-19-st006.pdf [file mBio.03221-19-st006.pdf]

**Table S6. Oligonucleotides used in this study**

| <b>Primers for constructing deletion mutants</b>                                                                                                       |                   |           |
|--------------------------------------------------------------------------------------------------------------------------------------------------------|-------------------|-----------|
| BT2167_5f – forward primer for the region upstream of <i>BT2167 (fusA2)</i> :<br>GCTCTAGAACTAGTGGATCCTTTCGCCGGGCAGTCCGTAA                              | This<br>stud<br>y | W3<br>569 |
| BT2167_5r – reverse primer for the region upstream of <i>BT2167 (fusA2)</i> :<br>AATATATAAGATTTTAGTAATTACTCAGTATGTTTCTCGC                              | This<br>stud<br>y | W3<br>570 |
| BT2167_3f – forward primer for the region downstream of <i>BT2167 (fusA2)</i> :<br>TTACTAAAATCTTATATATTACAATAATTCTCTCAAACACTGTTAAA<br>ACCG             | This<br>stud<br>y | W3<br>571 |
| BT2167_3r – reverse primer for the region downstream of <i>BT2167 (fusA2)</i> :<br>AAGATAACATTCGAGTCGACCGTCTAATCATGTCCAACACTACTT<br>C                  | This<br>stud<br>y | W3<br>572 |
| mutP2167uR – reverse primer for the region upstream of the 22bp motif<br>in <i>BT2167 (fusA2)</i> promoter:<br>TATTTATGACAGTGTTACTATCCGTTTTATGGGTAGCAG | This<br>stud<br>y | W4<br>686 |
| mutP2167dF – forward primer for the region downstream of the 22bp<br>motif in <i>BT2167 (fusA2)</i> promoter:<br>TAGTAACACTGTCATAAATATTGCTTTT          | This<br>stud<br>y | W4<br>687 |
| mutP2167dR – reverse primer for the region downstream of 22bp motif in<br><i>BT2167 (fusA2)</i> promoter:<br>AAGATAACATTCGAGTCGACACCAATGCTTTATGCATTTC  | This<br>stud<br>y | W4<br>688 |

| <b>Primers for constructing pNBU2-tetQ plasmids</b>                                                                                                                                                                        |                           |           |
|----------------------------------------------------------------------------------------------------------------------------------------------------------------------------------------------------------------------------|---------------------------|-----------|
| PmalRF – forward primer to generate a construct encoding wild-type BT4338 or BT4338 with a C-terminal epitope tag in pNBU2-tetQ:<br>GCTCTAGAACTAGTGGATCCTCAAAGTACTGGTACGCGAAATGA                                           | PMI<br>D:<br>2772<br>9509 | W2<br>935 |
| nbu4338-4xG-HAr – reverse primer to generate a construct encoding BT4338 with a C-terminal epitope tag in pNBU2-tetQ:<br>GAAGATAGGCAATTAGTCGACTTAAGCGTAGTCTGGGACGTCGTA<br>TGGGTACCCGCCACCTCCTCCTATCTTGCTTATTTTCTTGAGTTTTTC | This<br>stud<br>y         | W4<br>101 |
| nbu4338r – reverse primer to generate a construct encoding wild-type BT4338 in pNBU2-tetQ:<br>AAGATAGGCAATTAGTCGACTTATCCTATCTTGCTTATTTTCTTGA<br>GTTT                                                                       | This<br>stud<br>y         | W3<br>185 |
| <b>Primers for constructing pKNOCK-tetQ plasmids</b>                                                                                                                                                                       |                           |           |
| pKOBT2167f – forward primer to generate a construct encoding the C-terminal of BT2167 epitope tag in pKNOCK-tetQ:<br>AGTGGATCCCCGAAGATTCCGTATCGTGA                                                                         | This<br>stud<br>y         | W3<br>592 |
| nbuBT2167FL – reverse primer to generate a construct encoding the C-terminal of BT2167 epitope tag in pKNOCK-tetQ:<br>AAGATAGGCAATTAGTCGACTTACTTGTCATCGTCATCCTTATAAT<br>CTTCCTCTGTTTGTTTAGCTTCAAATC                        | This<br>stud<br>y         | W3<br>591 |
| koBo04581f – forward primer to generate a construct encoding the 157-556 bp of BT4338 sequolog in <i>B. ovatus</i> ( <i>Bovatus_RS22425</i> ) in pKNOCK-tetQ                                                               | This<br>stud<br>y         | W4<br>645 |

|                                                                                                                                                               |                           |           |
|---------------------------------------------------------------------------------------------------------------------------------------------------------------|---------------------------|-----------|
| koBo04581r – reverse primer to generate a construct encoding the 157-556 bp of BT4338 sequolog in <i>B. ovatus</i> ( <i>Bovatus_ RS22425</i> ) in pKNOCK-tetQ | This<br>stud<br>y         | W4<br>646 |
| <b>Primers for measuring gene expression by qPCR</b>                                                                                                          |                           |           |
| qBT16sF – forward primer for measuring the <i>fusA2</i> transcript by qPCR:GGTAGTCCACACAGTAAACGATGAA                                                          | PMI<br>D:<br>2772<br>9509 | 102<br>56 |
| qBT16sRr – reverse primer for measuring the <i>fusA2</i> transcript by qPCR:CCCGTCAAATTCCTTTGAGTTTC                                                           | PMI<br>D:<br>2772<br>9509 | 102<br>57 |
| qBT2167f – forward primer for measuring the <i>fusA2</i> transcript by qPCR:AAAACGTCGCGGATCTGTTG                                                              | This<br>stud<br>y         | W3<br>565 |
| qBT2167r – reverse primer for measuring the <i>fusA2</i> transcript by qPCR:TTTCCAGACGCCACTTCAAC                                                              | This<br>stud<br>y         | W3<br>566 |
| q2729F890 – forward primer for measuring the <i>fusA</i> transcript by qPCR:CGAATACAGGTGCAGAAGAA                                                              | This<br>stud<br>y         | W4<br>344 |
| q2729R990 – reverse primer for measuring the <i>fusA</i> transcript by qPCR:GTCAAACGACCTACATAAGGG                                                             | This<br>stud<br>y         | W4<br>345 |

|                                                                                                                     |                           |           |
|---------------------------------------------------------------------------------------------------------------------|---------------------------|-----------|
| qBT0356F – forward primer for measuring the <i>araM</i> transcript by qPCR:<br>AACGGCAACGGATATGATCAC                | PMI<br>D:<br>2772<br>9509 | W1<br>784 |
| qBT0356R – reverse primer for measuring the <i>araM</i> transcript by qPCR:<br>GCTACCTGCGAGATGTCACCTT               | PMI<br>D:<br>2772<br>9509 | W1<br>785 |
| <b>ChIP-qPCR primers</b>                                                                                            |                           |           |
| 1311chipF – forward primer for measuring the ChIP-enrichment of<br><i>BT1311</i> promoter: GTCAGTGATCTGGAAGAAGCAATG | PMI<br>D:<br>2504<br>1429 | 136<br>21 |
| 1331chipR – reverse primer for measuring the ChIP-enrichment of <i>BT1311</i><br>promoter: GGGAATACACCTGTCAGGAACAA  | PMI<br>D:<br>2504<br>1429 | 136<br>22 |
| CHIP2167F1 – forward primer for measuring the ChIP-enrichment of<br><i>fusA2</i> promoter: GCATCACTAAATTAATGGTATGCG | This<br>stud<br>y         | W4<br>852 |
| CHIP2167R1 – reverse primer for measuring the ChIP-enrichment of<br><i>fusA2</i> promoter: CCCAACAAGGCAATGTTCT      | This<br>stud<br>y         | W4<br>853 |

|                                                                                                                  |                           |           |
|------------------------------------------------------------------------------------------------------------------|---------------------------|-----------|
| CHIPBT0356F – forward primer for measuring the ChIP-enrichment of <i>fusA2</i> promoter: CGGCTTCCGAGCTGACTTTA    | This study                | W3<br>335 |
| CHIPBT0356R – reverse primer for measuring the ChIP-enrichment of <i>fusA2</i> promoter: GGCATTGTTCACTTCTGTTTG   | This study                | W3<br>336 |
| 3348chipF – forward primer for measuring the ChIP-enrichment of <i>BT3348</i> promoter: CTGTGCAAATATGCCCTTCAAG   | PMI<br>D:<br>2504<br>1429 | 133<br>13 |
| 3348chipR – reverse primer for measuring the ChIP-enrichment of <i>B3348</i> promoter: GAATAGACCGTCCCAAATAATCCA  | PMI<br>D:<br>2504<br>1429 | 133<br>14 |
| <b>qPCR primers for bar-coded strains</b>                                                                        |                           |           |
| pNBU2_tet_BC01 – forward primer for measuring the bar-code in <i>pNBU2-tetQ::BC01</i> : ATGTCGCCAATTGTCACCTTCTCA | PMI<br>D:<br>1899<br>6345 | W1<br>701 |
| pNBU2_tet_BC03 – forward primer for measuring the bar-code in <i>pNBU2-tetQ::BC03</i> : TTATGACCAGCCGCAAATGAAAAG | PMI<br>D:<br>1899<br>6345 | W1<br>702 |
